# Supplementary material for: Early-Life Immune System Maturation in Chickens Using a Synthetic Community of Cultured Gut Bacteria
Source: PubMed Central journal article supplement (PMC8269260; doi:10.1128/msystems.01300-20), 2021-05-18

**Suppl. Fig. S1:** Rarefaction curves derived from the 16S rRNA gene amplicon sequencing data

**Chicken trial 1 (MM vs. SPF)**

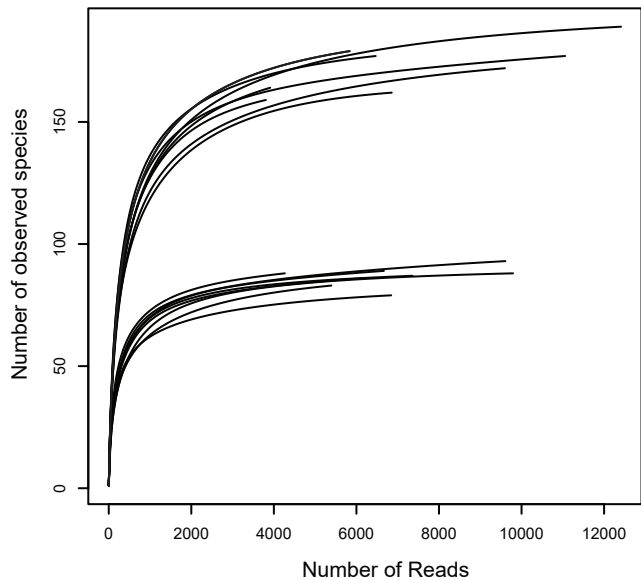

**Chicken trial 2 (SYN)**

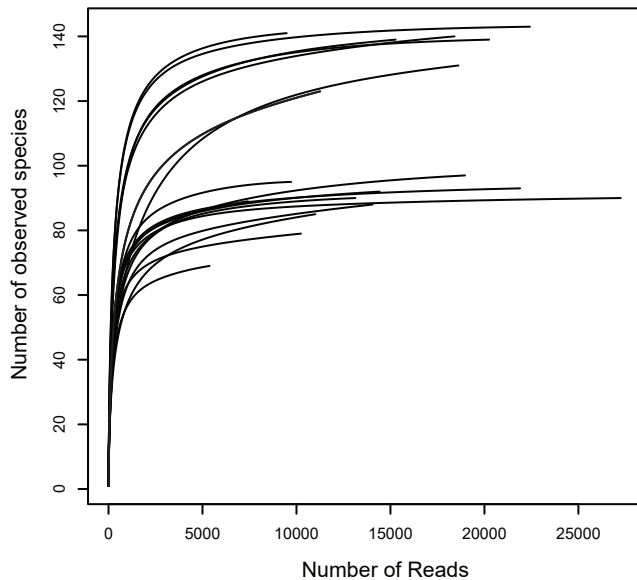

Supplement: msystems.01300-20-sf001.pdf [file msystems.01300-20-sf001.pdf]
