# Supplementary material for: Early-Life Immune System Maturation in Chickens Using a Synthetic Community of Cultured Gut Bacteria
Source: PubMed Central journal article supplement (PMC8269260; doi:10.1128/msystems.01300-20), 2021-05-18

**Suppl. Fig. S2 A** 16S rRNA gene-based phylogenetic (1) and phylogenomic (2) trees; electron micrographs (3) of *Gallibacter intestinalis* gen.nov., sp.nov.

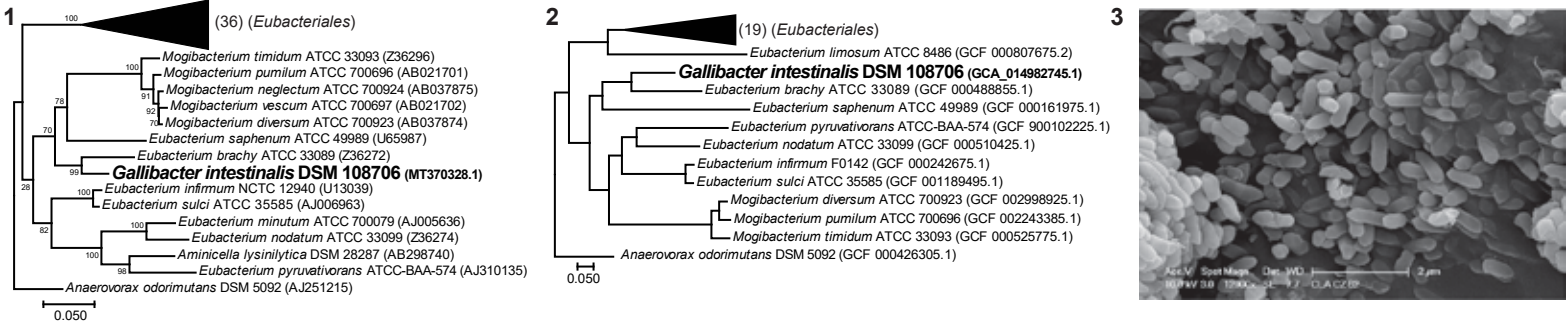

**Suppl. Fig. S2 B** 16S rRNA gene-based phylogenetic (1) and phylogenomic (2) trees; electron micrographs (3) of *Gallistipes aquisgranensis* gen.nov., sp.nov.

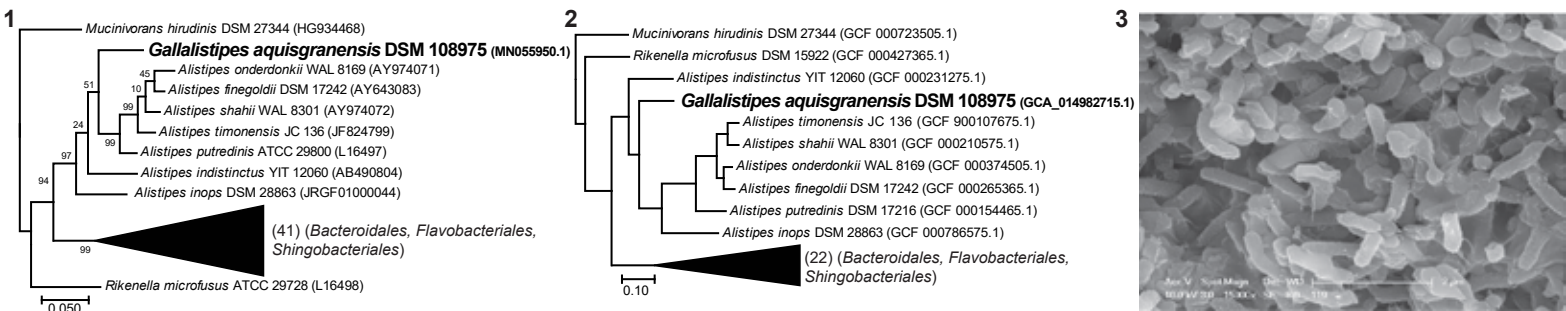

**Suppl. Fig. S2 C** 16S rRNA gene-based phylogenetic (1) and phylogenomic (2) trees; electron micrographs (3) of *Gemmiger gallinarum* sp.nov.

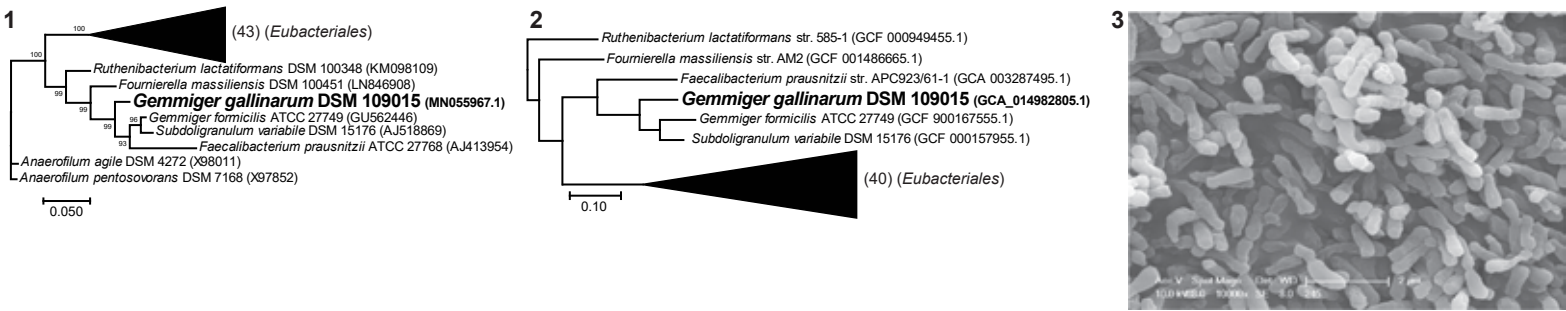

**Suppl. Fig. S2 D** 16S rRNA gene-based phylogenetic (1) and phylogenomic (2) trees; electron micrographs (3) of *Olsenella gallinarum* sp.nov.

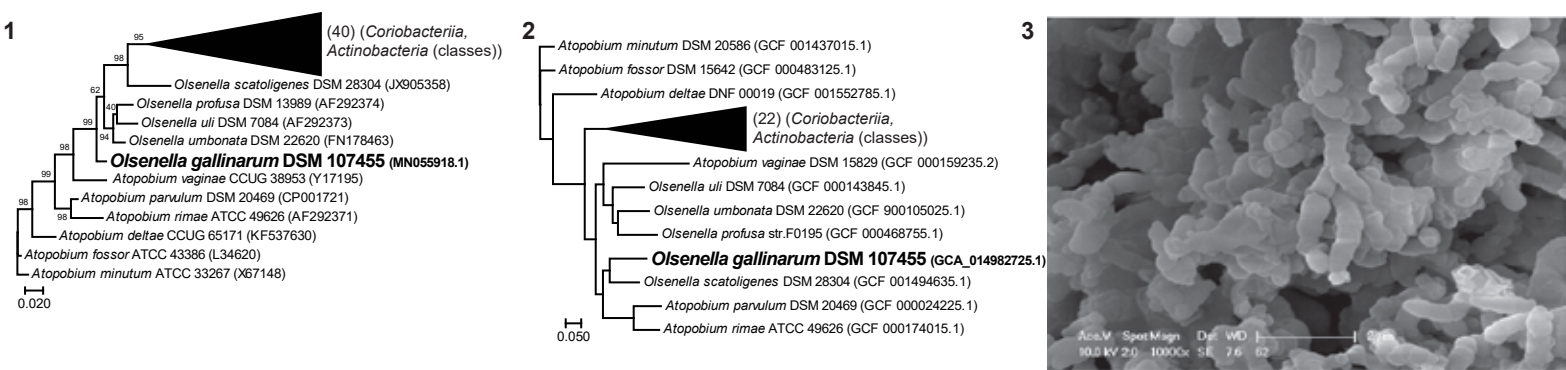

**Suppl. Fig. S2 E** 16S rRNA gene-based phylogenetic (1) and phylogenomic (2) trees; electron micrographs (3) of *Pseudoflavonifractor gallinarum* sp.nov.

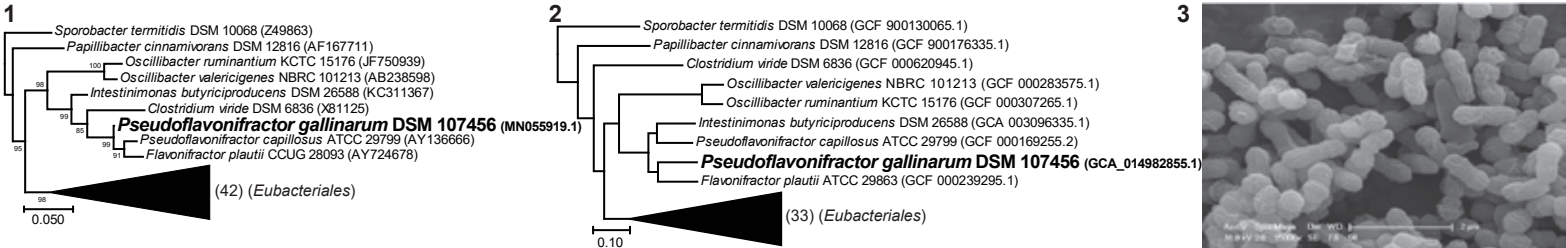

**Suppl. Fig. S2 F** 16S rRNA gene-based phylogenetic (1) and phylogenomic (2) trees; electron micrographs (3) of *Ructibacterium gallinarum* gen.nov, sp.nov.

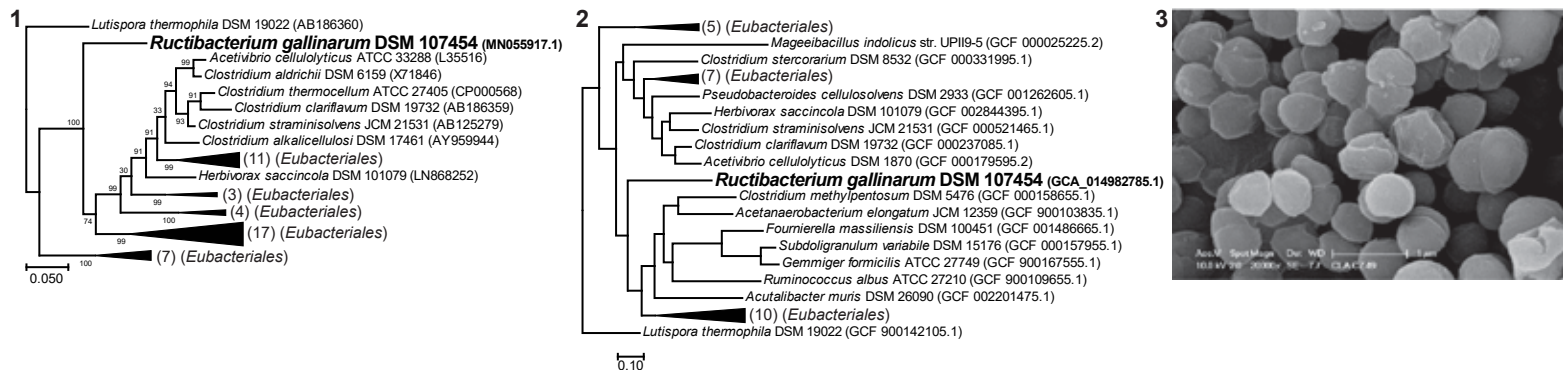

**Suppl. Fig. S2 G** 16S rRNA gene-based phylogenetic (1) and phylogenomic (2) trees; electron micrographs (3) of *Sellimonas monacensis* sp.nov.

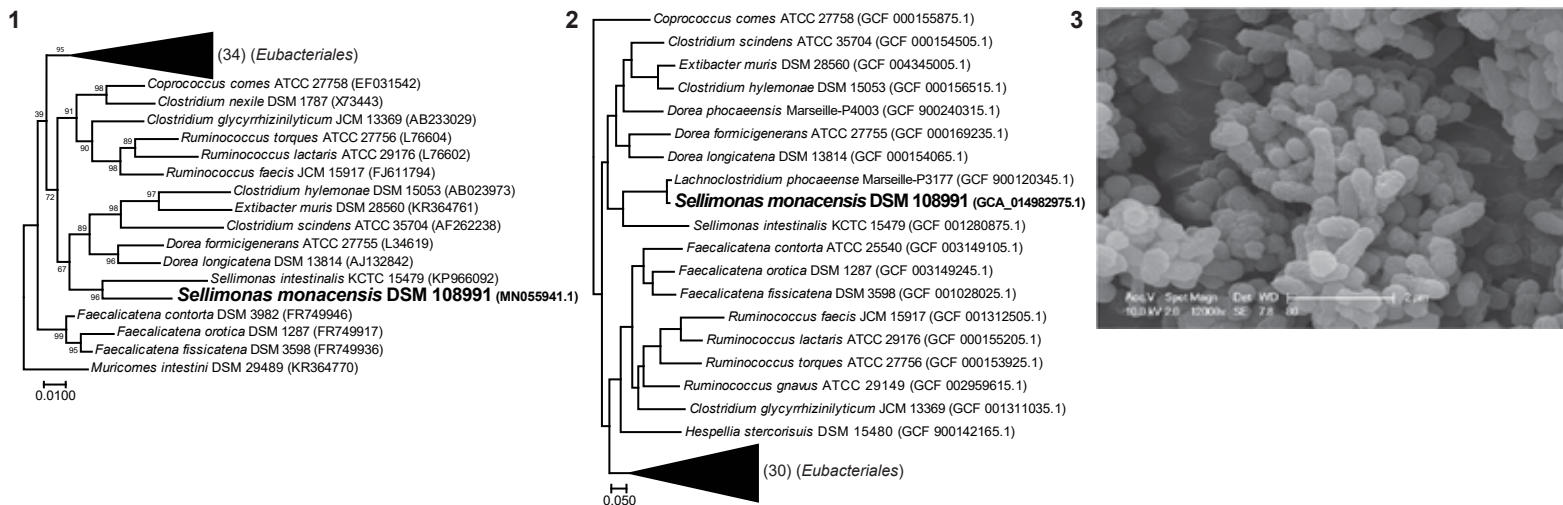

Supplement: msystems.01300-20-sf002.pdf [file msystems.01300-20-sf002.pdf]
