# Supplementary material for: Early-Life Immune System Maturation in Chickens Using a Synthetic Community of Cultured Gut Bacteria
Source: PubMed Central journal article supplement (PMC8269260; doi:10.1128/msystems.01300-20), 2021-05-18
Supplement: msystems.01300-20-sf003.pdf [file msystems.01300-20-sf003.pdf]

# Suppl. Fig. S3: Identification of strain Cla-CZ-1 (=DSM 109009) as a member of the genus *Escherichia*

## Identification methods:

### MALDI-TOF

*Escherichia coli*

### 16S rRNA gene sequence identities

*Escherichia marmotae* 99.3%

*Shigella flexneri* 99.2%

*Shigella dysenteriae* 99.1%

*Escherichia coli* 99.0%

### ANI values

*Shigella flexneri* 97.8%

*Shigella dysenteriae* 97.0%

*Escherichia coli* 96.6%

### GTDB-Tk assignment

*Escherichia flexneri*

### dDDH values

*Shigella sonnei* 88.5%

*Shigella boydii* 88.4%

*Shigella flexneri* 85.7%

*Shigella dysenteriae* 81.8%

*Escherichia coli* 73.8%

*Escherichia marmotae* 43.3%

### G+C difference

*Escherichia coli* 0.15%

*Shigella flexneri* 0.17%

*Escherichia marmotae* 0.18%

## TEM negative stain of strain Cla-CZ-1

*Escherichia* spp. are usually motile thanks to flagella whilst *Shigella* spp. are not, although their flagella genes may be expressed under rare circumstances

[Girón, Mol Microbiol., 1995 Oct, 18: (1):63-75. doi: 10.1111/j.1365-2958.1995.mmi\_18010063.x.]

[Ragupathi et al., New Microbes New Infect, 2018 Jan, 21: 58-62, doi: 10.1016/j.nmni.2017.09.003]

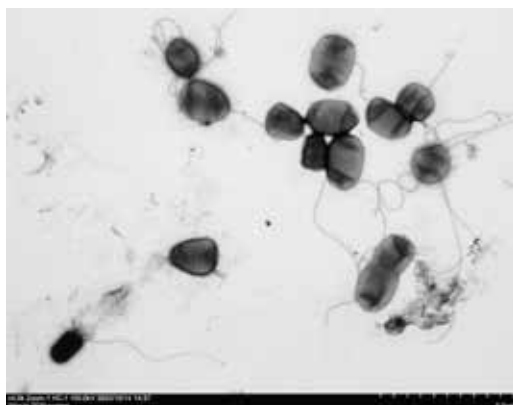

4,000x magnification

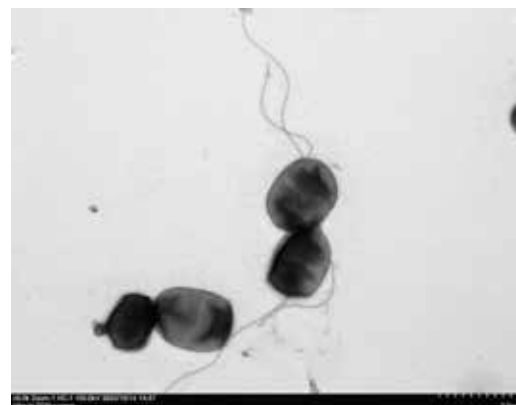

6,000x magnification

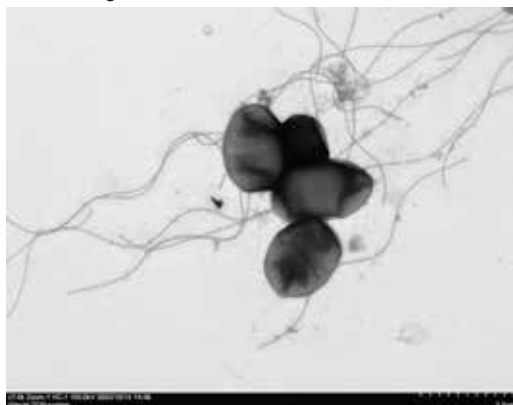

7,000x magnification

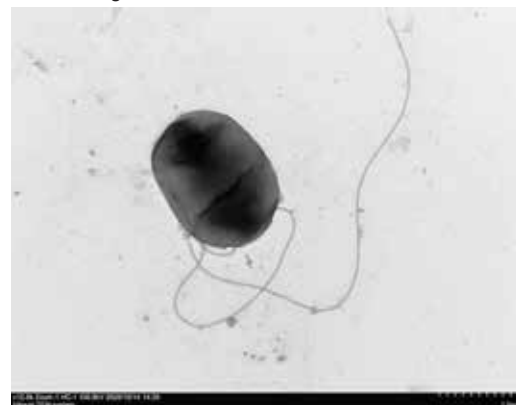

12,000x magnification
